# Supplementary material for: Iodide-mediated templating synthesis of highly porous rhodium nanospheres for enhanced dehydrogenation of ammonia borane
Source: Royal Society of Chemistry journal article supplement (doi:10.1039/c8ta09077g), 2018-01-01
Supplement: c8ta09077g1.pdf [file c8ta09077g1.pdf]

## Electronic Supplementary Information

### Iodide-Mediated Templating Synthesis of Highly Porous Rhodium Nanospheres for Enhanced Dehydrogenation of Ammonia Borane

*Houbing Zou, Bo Jin, Runwei Wang,\* Yanbo Wu, Hengquan Yang\* and Shilun Qiu*

Dr. H. B. Zou, B. Jin, Prof. Y. B. Wu, Prof. H. Q. Yang  
School of Chemistry and Chemical Engineering  
Shanxi University  
92 Wucheng Road, Taiyuan, 030006 (P. R. China)  
E-mail: hqyang@sxu.edu.cn

Dr. H. B. Zou, Prof. R. W. Wang, Prof. S. L. Qiu  
State Key Laboratory of Inorganic Synthesis and Preparative Chemistry  
College of Chemistry  
Jilin University  
2699 Qianjin Street, Changchun, 130012 (P. R. China)  
E-mail: rwwang@jlu.edu.cn  
Telephone: +86-431-85168115  
Fax numbers: +86-431-85168115

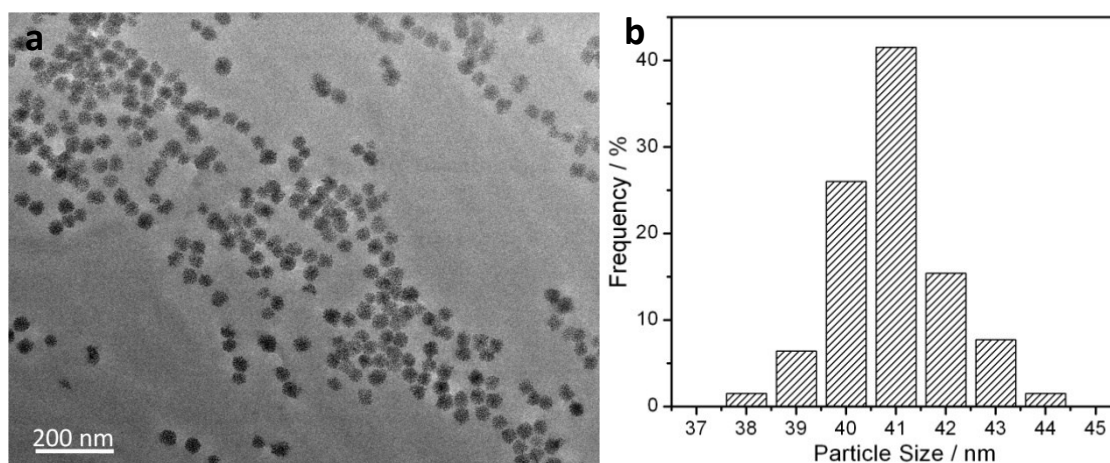

**Figure S1.** (a) Low-magnification TEM image and (b) size distribution histogram of the highly porous Rh nanospheres (HPRhS).

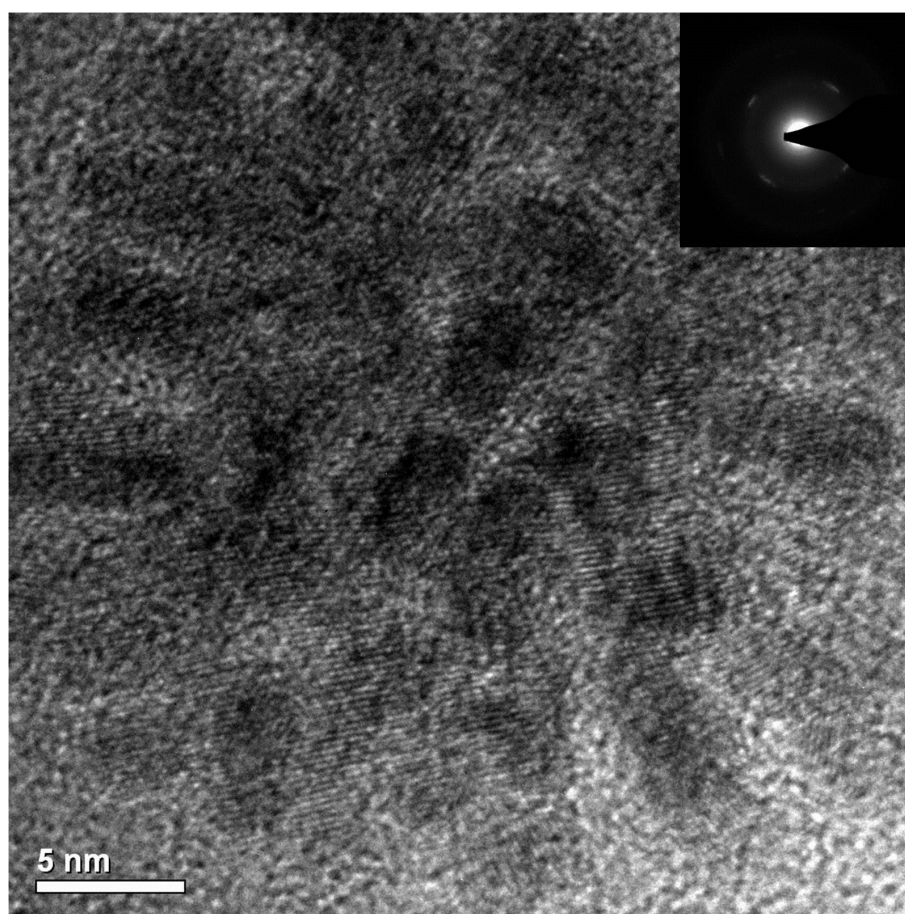

**Figure S2.** HRTEM image and SAED pattern (the inset) of an individual HPRhS nanoparticle.

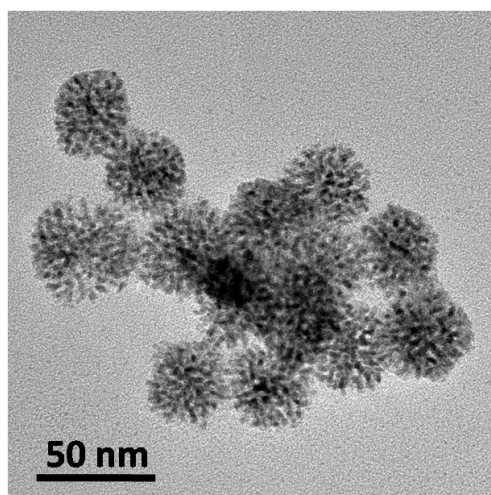

**Figure S3.** Typical TEM image of the HPRhS sample after sonicating for 3 hours.

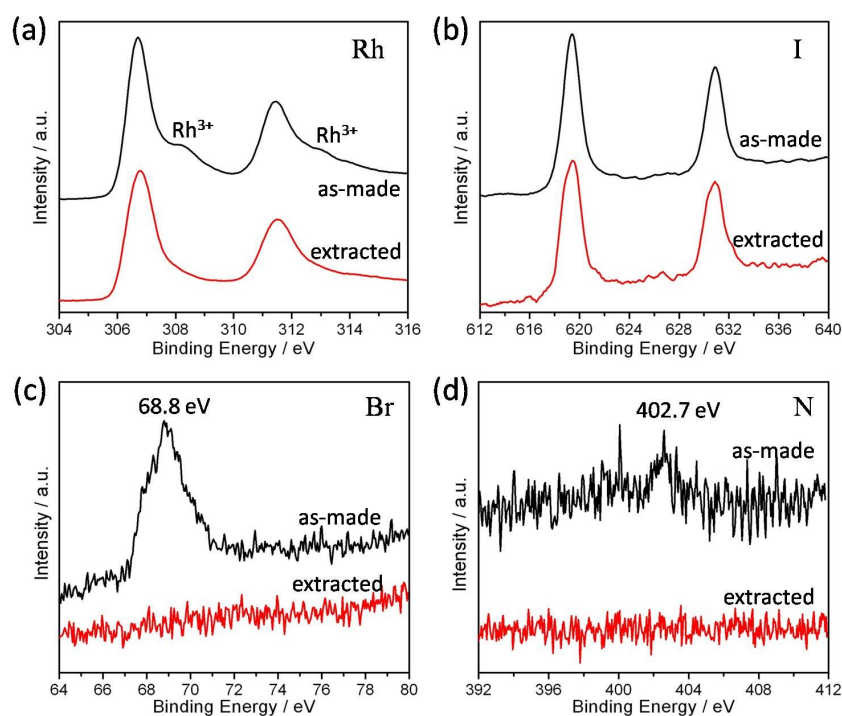

**Figure S4.** Rh 3d (a), I 3d (b), Br 3d (c) and N 1s (d) XPS spectra of the as-made HPRhS (black line) and extracted HPRhS (red line).

It can be seen clearly that there is another broad peak at the binding energy of 308.4 eV in the Rh XPS spectrum of as-made sample besides the zerovalent state (306.8 eV), which can be assigned to the  $\text{Rh}^{3+}$  state. Moreover, I, Br and N elements are also detected in the as-made sample according to their XPS spectra. These results indicate that the surfactant CTAB molecules occupy in the nanopores of as-made HPRhS and there is some unreduced  $\text{Rh}^{3+}$  absorbing on the nanopore surface. After refluxing as-made material in acid ethanol solution for 12 h twice, only I- and  $\text{Rh}^0$  state can be detected in the extracted sample, which suggest that the surfactant molecules have been removed well and the iodide ion is anchored on the nanopore surface due to its strong chelating capacity, then leading to an open nanopore and a functional pore surface.

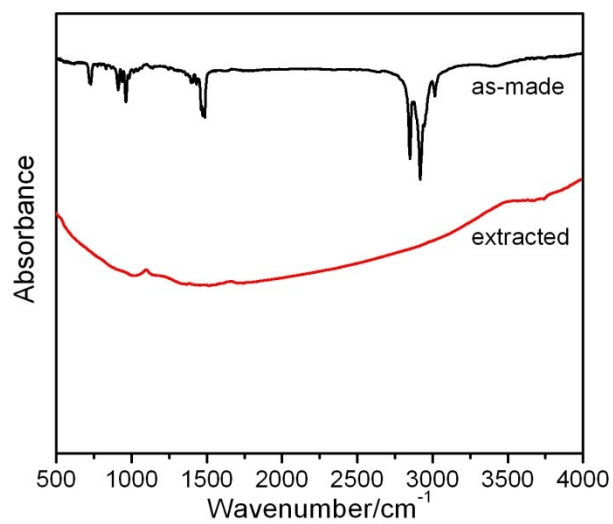

**Figure S5.** FT-IR spectra of the as-made HPRhS and extracted HPRhS.

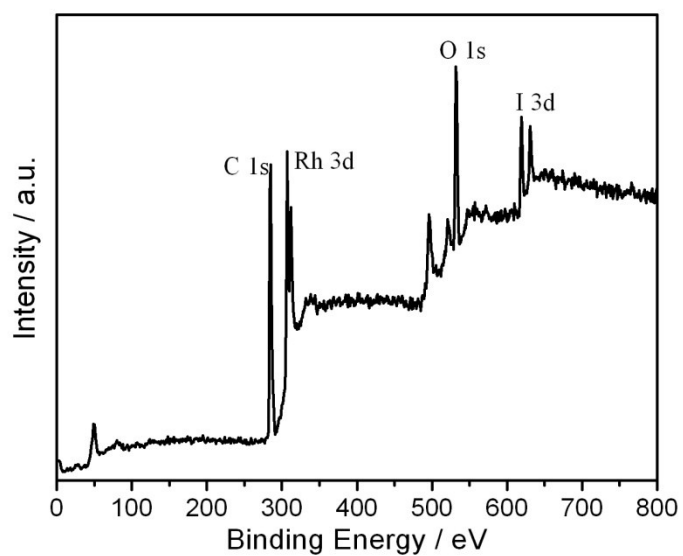

**Figure S6.** Survey XPS spectrum of the extracted HPRhS.

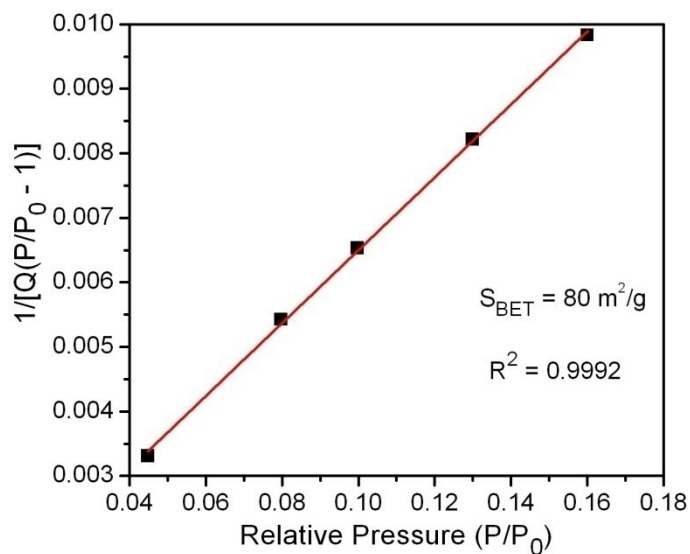

**Figure S7.** BET plot of the extracted HPRhS sample calculated from the N<sub>2</sub> adsorption isotherm.

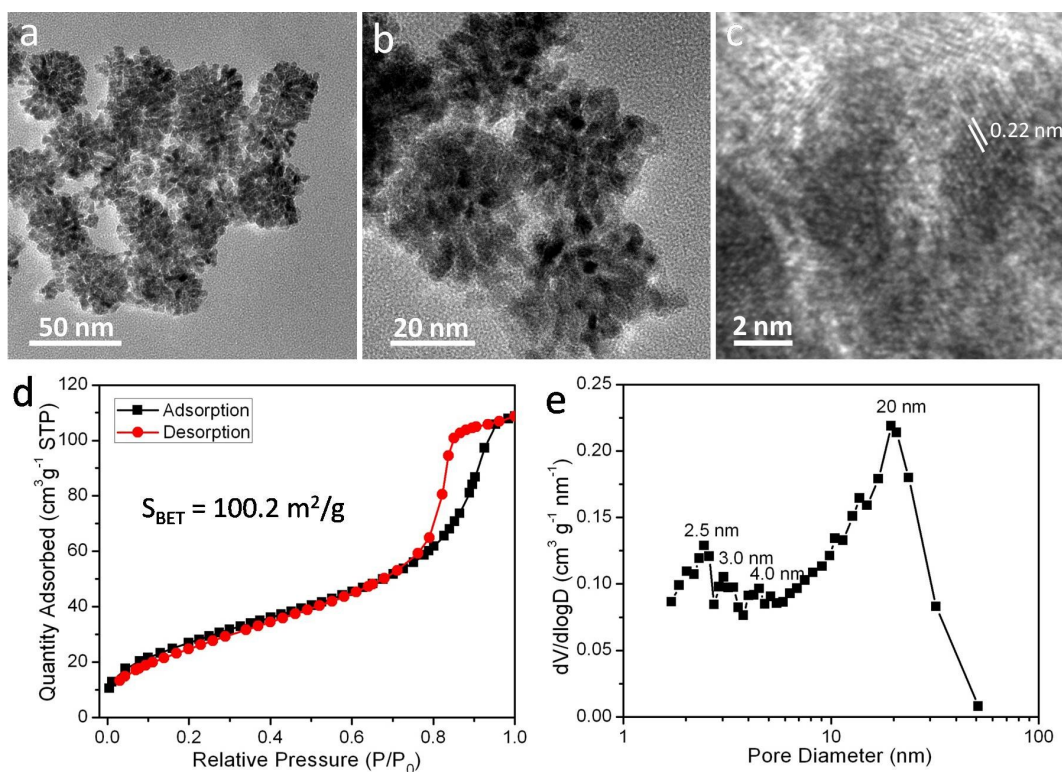

**Figure S8.** TEM images (a, b, c), N<sub>2</sub> adsorption-desorption isotherms (d) and pore size distribution plot (e) of HPRhS calcinated for 3 hours under air (250 °C). The HRTEM image suggests that the treated HPRhS is still in metal state. The ICP-AES analysis reveals that the molar ratio of Rh to I is 60:1, indicating most of iodide ions have been removed via calcination.

**Table S1** BET special surface areas and pore sizes of different nanoporous noble metal nanoparticles

| Sample                                         | Pore Size | Method                                       | BET Special Surface Area             | References                            |
|------------------------------------------------|-----------|----------------------------------------------|--------------------------------------|---------------------------------------|
| Mesoporous Pt single crystalline               | 2.7 nm    | Nanocasting from KIT-6                       | 39 m <sup>2</sup> g <sup>-1</sup>    | JACS, <b>2011</b> , 133, 14526.       |
| Dendritic Pt NPs                               | 2-4 nm    | wet chemistry F127 as template               | 56 m <sup>2</sup> g <sup>-1</sup>    | JACS, <b>2009</b> , 131, 9152.        |
| MesoporousPd@PtNPs with concave surface        | -         | wet chemistry F127 as template               | 40 m <sup>2</sup> g <sup>-1</sup>    | Angew., <b>2013</b> , 52, 13611.      |
| Mesoporous Pt Nanospheres with large mesopores | 8-35 nm   | wet chemistry PS-b-P2VP-b-PEO as template    | 30 m <sup>2</sup> g <sup>-1</sup>    | Angew., <b>2015</b> , 54, 11073.      |
| Porous Pd nanosphere with perpendicular pore   | 2-3 nm    | wet chemistry HDPC as template               | 61.2 m <sup>2</sup> g <sup>-1</sup>  | Angew., <b>2013</b> , 52, 2520.       |
| Mesoporous Rh NPs with large mesopores         | 20 nm     | wet chemistry PEO- <i>b</i> -PMMAas template | 50 m <sup>2</sup> g <sup>-1</sup>    | Nature Comm., <b>2017</b> , 8, 15581. |
| HPRhS-extracted                                | 2-3 nm    | wet chemistry $\Gamma$ and CTAB as template  | 80 m <sup>2</sup> g <sup>-1</sup>    | <b><i>This work</i></b>               |
| HPRhS-calcined                                 | 2-4 nm    | wet chemistry $\Gamma$ and CTAB as template  | 100.2 m <sup>2</sup> g <sup>-1</sup> | <b><i>This work</i></b>               |

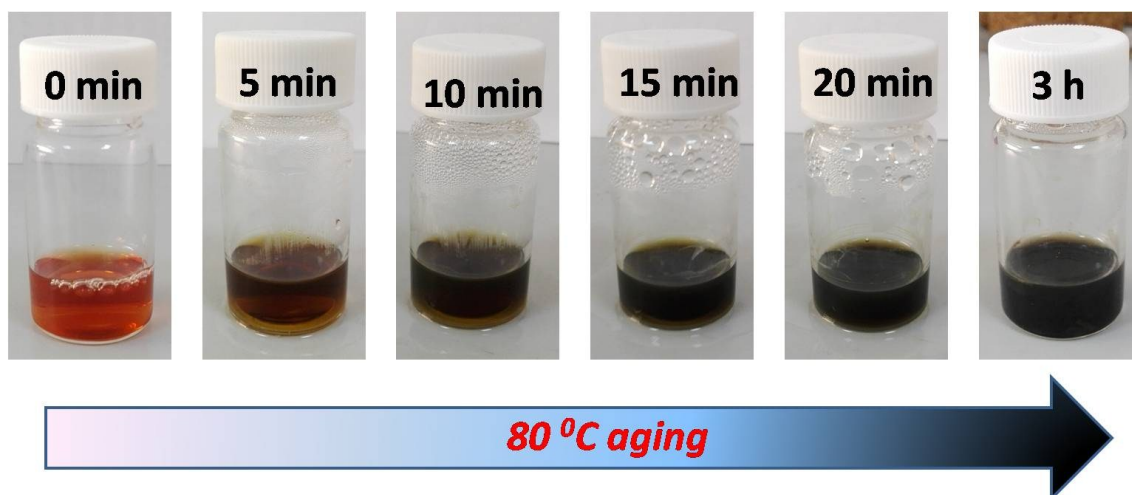

**Figure S9.** Photographs of the HPRhS sample aging at different reaction times.

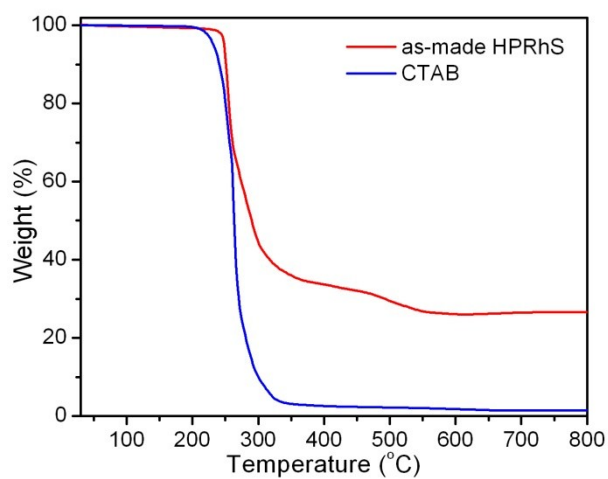

**Figure S10.** TG curves of the as-made HPRhS and the surfactant CTAB.



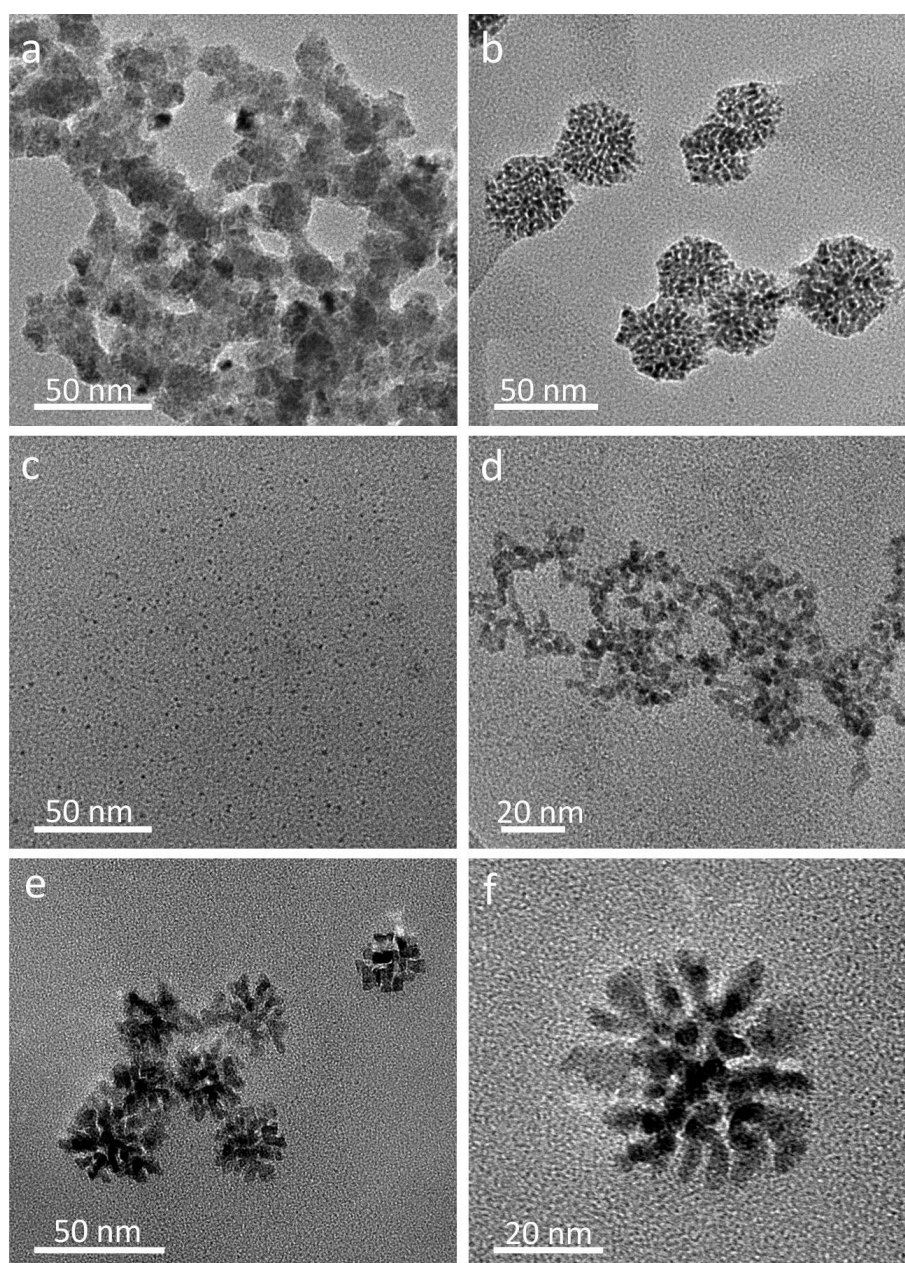

**Figure S11.** TEM images of the Rh sample prepared at the similar reaction conditions for the typical HPRhS but (a) in the absence of CTAB, (b) using 50 mg of CTAB, (c) using PVP to replace the CTAB, (d) using strong reductant  $\text{NaBH}_4$  to replace AA and (e, f) using another weak reducing agent HQ to replace AA.



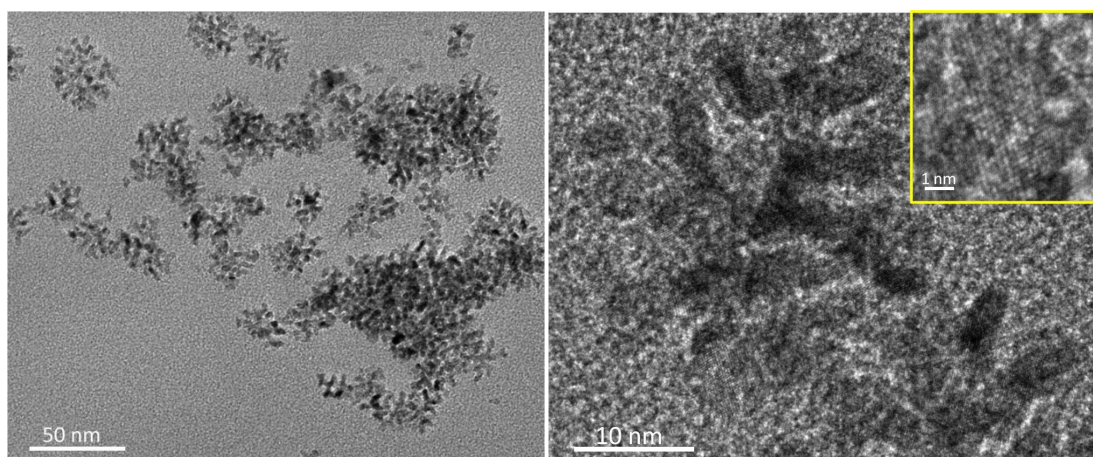

**Figure S12.** TEM images of the porous Rh nanoparticles prepared under the identical reaction conditions for the typical HPRhS but in the absence of I<sup>-</sup>.

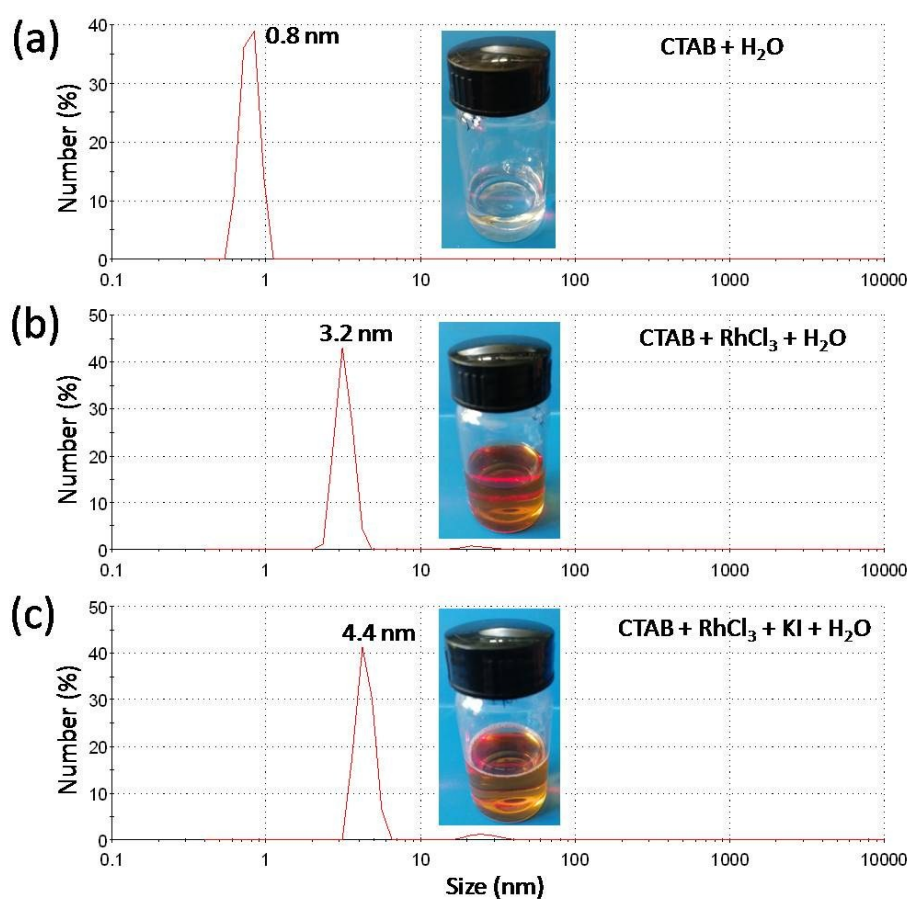

**Figure S13.** Hydrodynamic diameter determination of CTAB solution, the mixture of precursor and CTAB, and the mixture of precursor, CTAB and KI obtained through dynamic light scattering (DLS). The insets show corresponding Tyndall effect.

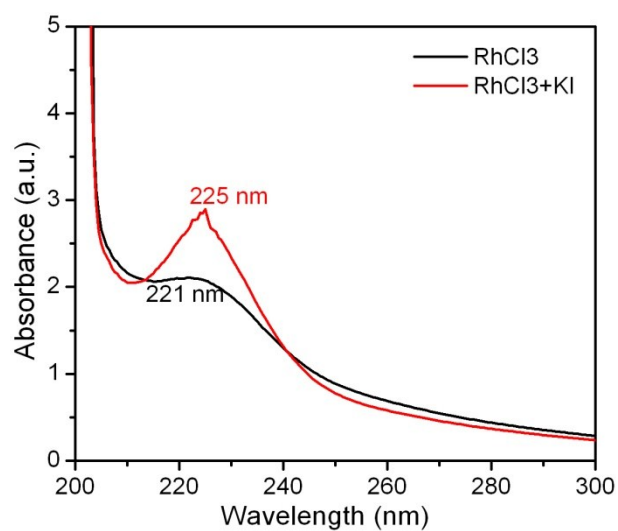

**Figure S14.** UV-Vis spectra of the  $\text{RhCl}_3$  aqueous solution and the  $\text{RhCl}_3+\text{KI}$  aqueous solution.

After the addition of the iodide ions, the absorbance peak shifted from 221 nm to 225 nm, suggesting that the iodide ions have complexed with the  $\text{Rh}^{3+}$ . This result reveals that the iodide ions have a stronger chelating capacity due to their stronger electron donating capacity.

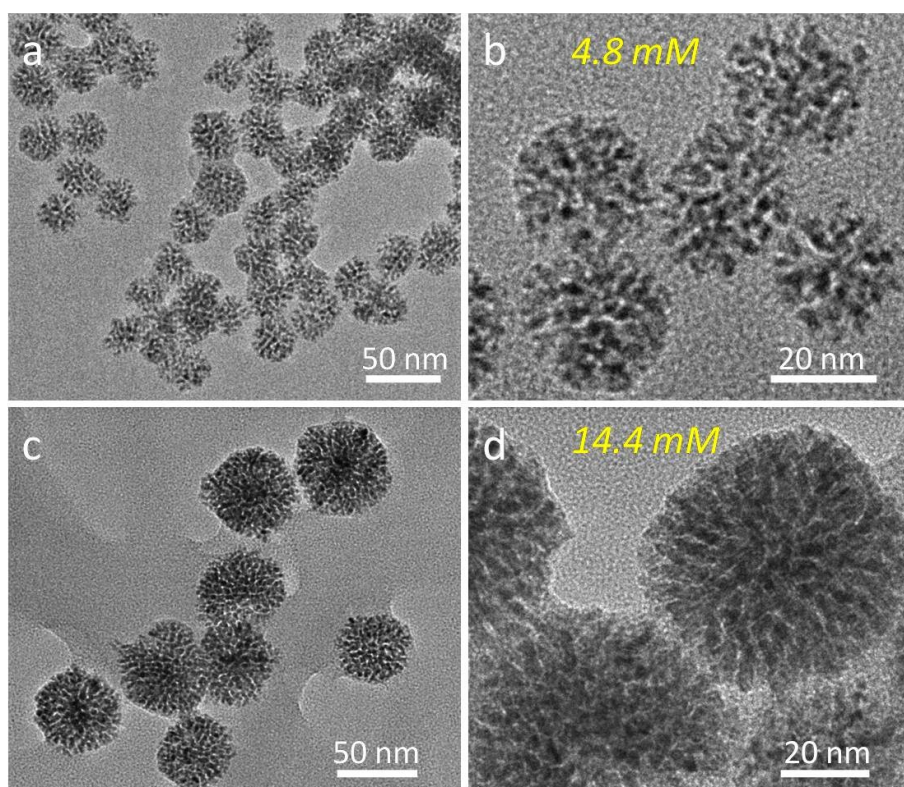

**Figure S15.** TEM images of HPRhS with tunable particle sizes prepared under different concentrations of  $\text{RhCl}_3$  precursor: (a, b) 4.8 mM, (c, d) 14.4 mM.

**Table S2** Methanolytic dehydrogenation of AB over reported catalysts and our HPRhS.

| Catalyst                | Temp (°C) | Catalyst/AB molar ratio (mol mol <sup>-1</sup> ) | TOF (mol <sub>H2</sub> ·mol <sub>cat</sub> <sup>-1</sup> ·min <sup>-1</sup> ) | References                                       |
|-------------------------|-----------|--------------------------------------------------|-------------------------------------------------------------------------------|--------------------------------------------------|
| Rh/nanoSiO <sub>2</sub> | 25        | 0.00245                                          | 168                                                                           | Appl. Catal., B <b>2016</b> , 181, 716.          |
| Rh/nanoHAP              | 25        | 0.00203                                          | 147                                                                           | Int. J. Hydrogen Energy <b>2015</b> , 40, 10491. |
| Rh/Zeolite              | 25        | 0.0034                                           | 30                                                                            | Appl. Catal., B <b>2010</b> , 93, 387.           |
| Ru/MMT                  | 25        | 0.003                                            | 118.1                                                                         | Int. J. Hydrogen Energy <b>2010</b> , 35, 10317. |
| Ru/graphene             | 25        | 0.003                                            | 99.4                                                                          | Int. J. Hydrogen Energy <b>2015</b> , 40, 10856. |
| PVP-stabilized Ru       | 25        | 0.0075                                           | 47.7                                                                          | Catal Today <b>2011</b> , 170, 93-8.             |
| PVP-stabilized Pd       | 25        | 0.005                                            | 22.3                                                                          | Phys. Chem. Chem. Phys. <b>2009</b> , 11, 10519. |
| CuPd/C                  | 25        | 0.072                                            | 53.2                                                                          | Nanotechnology <b>2015</b> , 26, 025401.         |
| CoPd/C                  | 25        | 0.027                                            | 27.7                                                                          | ACS Catal. <b>2012</b> , 2, 1290.                |
| Rh/CC3-R-homo           | 25        | 0.0199                                           | 215.3 (0.7 min)                                                               | JACS, <b>2015</b> , 137, 7063.                   |
| Rh/CC3-R-hetero         | 25        | 0.0199                                           | 65.5 (2.3 min)                                                                | JACS, <b>2015</b> , 137, 7063.                   |
| Rh/P(triaz)             | 25        | 0.01                                             | 260 (1.16 min)                                                                | JACS, <b>2017</b> , 139, 8971.                   |
| Ru NPs@PCC-2            | 25        | 0.0035                                           | 304.4 (4.5 min)                                                               | Chem. <b>2018</b> , 4, 555.                      |
| HPRhS                   | 25        | 0.00486                                          | <b>291.6 (2.11 min)</b>                                                       | <b><i>This work</i></b>                          |
| HPRhS                   | <b>0</b>  | 0.0097                                           | <b>50.6 (6.1 min)</b>                                                         | <b><i>This work</i></b>                          |



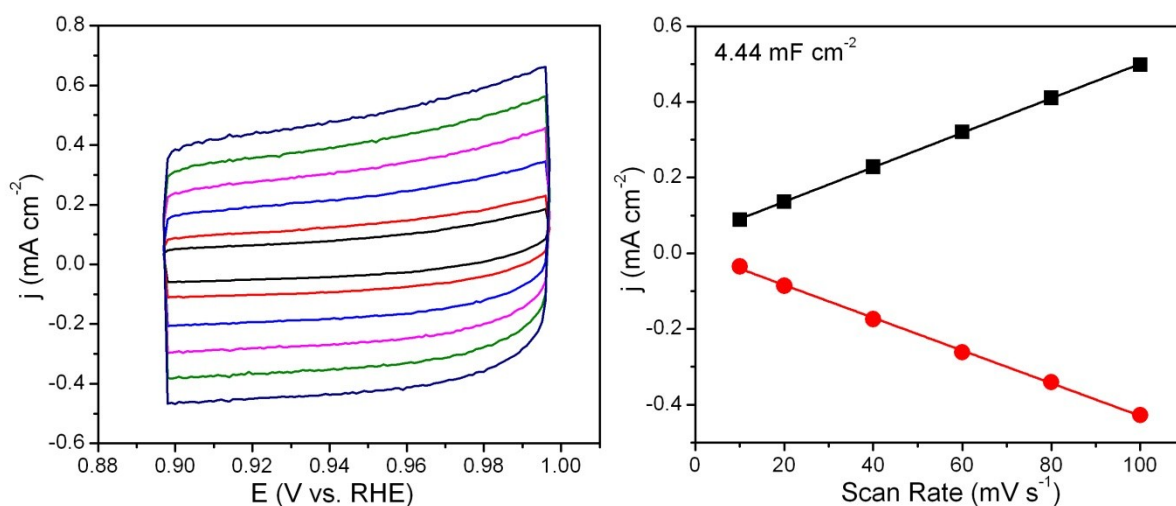

**Figure S16.** Cyclic voltammogram of our catalyst HPRhS recorded at room temperature in a N<sub>2</sub>-purged 0.5 M H<sub>2</sub>SO<sub>4</sub> solution.

Our catalyst HPRhS displays an outstandingly high electrochemically active surface area (EASA) of 110 m<sup>2</sup>/g, which is much higher than that of most of reported noble metal nanoparticles.<sup>1-3</sup> Such a high EASA indicates that there are high-density of available active sites on the (nanopore) surface.

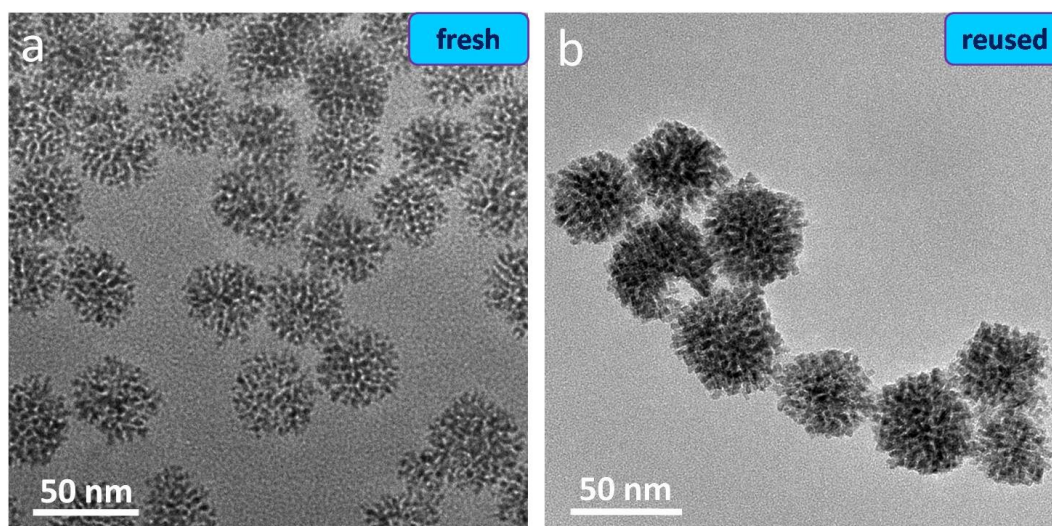

**Figure S17.** TEM images of the fresh prepared HPRhS (a) and the reused HPRhS (b).

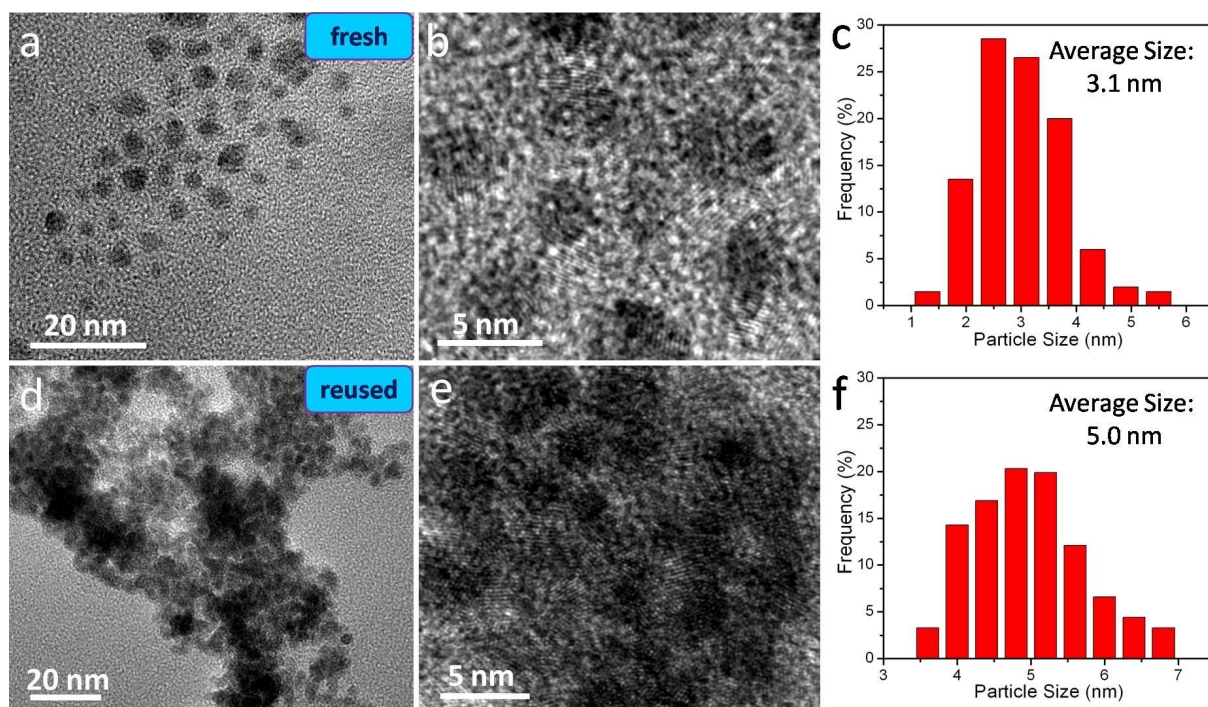

**Figure S18.** TEM images (a, b, d, e) and particle size distributions (c, f) of the fresh Rh nanoparticles (a, b, c) and the recovered Rh nanoparticles (d, e, f).

## References

- [1] X. Q. Huang, E. B. Zhu, Y. Chen, Y. J. Li, C.-Y. Chiu, Y. X. Xu, Z. Y. Lin, X. F. Duan, Y. Huang, *Adv. Mater.* **2013**, 25, 2974.
- [2] Y. Li, B. P. Bastakoti, V. Malgras, C. Li, J. Tang, J. H. Kim, Y. Yamauchi, *Angew. Chem. Int. Ed.* **2015**, 54, 11073.
- [3] X. Huang, Z. Zhao, L. Cao, Y. Chen, E. Zhu, Z. Lin, M. Li, A. Yan, A. Zettl, Y. M. Wang, X. Duan, T. Mueller, Y. Huang, *Science* **2015**, 348, 1230.
